# Supplementary material for: Monapinone Coupling Enzyme Produces Non-Natural Heterodimers
Source: MDPI journal article supplement (doi:10.3390/catal11081015), 2021-08-23
Supplement: s1 [file s1]

## **Monapinone coupling enzyme produces non-natural heterodimers**

Satoshi Ohte<sup>1,2</sup>, Masayuki Toyoda<sup>1</sup>, Keisuke Kobayashi<sup>1,2</sup>, Isao Fujii<sup>3</sup>, Taichi Ohshiro<sup>1,2\*</sup>  
and Hiroshi Tomoda<sup>3\*</sup>

1: Department of Microbial Chemistry, Graduate School of Pharmaceutical Sciences,  
Kitasato University, 5-9-1 Shirokane, Minato-ku, Tokyo 108-8641, Japan

2: Medicinal Research Laboratory, School of Pharmacy, Kitasato University, 5-9-1  
Shirokane, Minato-ku, Tokyo 108-8641, Japan

3: Drug Discovery Laboratory, Graduate School of Pharmaceutical Sciences, Kitasato  
University, 5-9-1 Shirokane, Minato-ku, Tokyo 108-8641, Japan

\*E-mails: [ohshiro@pharm.kitasato-u.ac.jp](mailto:ohshiro@pharm.kitasato-u.ac.jp) and [tomodah@pharm.kitasato-u.ac.jp](mailto:tomodah@pharm.kitasato-u.ac.jp)

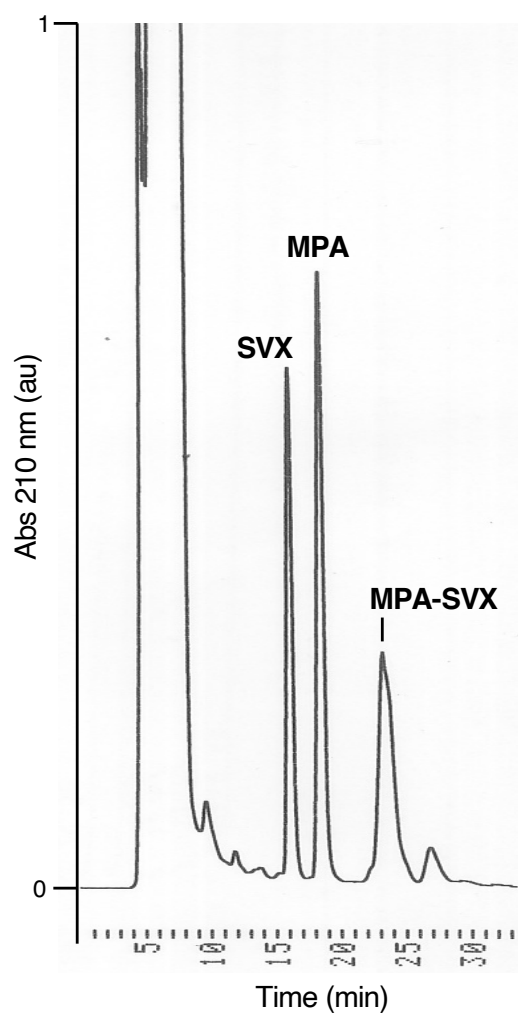

Supplementary Figure S1. Isolation of atropmixture of MPA-SVX by preparative HPLC (column, PEGASIL ODS SP100, i.d. 20 x 250 mm); mobile phase, 75% aqCH<sub>3</sub>CN-0.05% TFA isocratic; detection, UV at 210 nm; flow rate, 8.0 ml min<sup>-1</sup>).

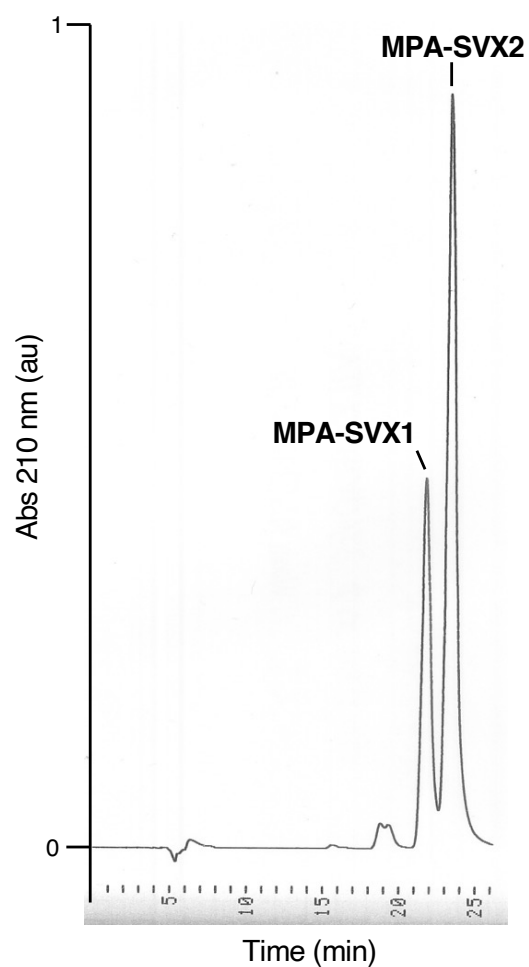

Supplementary Figure S2. Isolation of MPA-SVX1 and MPA-SVX2 by preparative HPLC (column, Develosil C30 column, i.d. 20 x 250 mm); mobile phase, 80% aqCH<sub>3</sub>CN-0.05% TFA isocratic; detection, UV at 210 nm; flow rate, 8.0 ml min<sup>-1</sup>).

Supplementary Table S1. NMR chemical shifts of MPA-SVX-1 (**1**) and MPA-SVX-2 (**2**) in CDCl<sub>3</sub>.

| <b>1</b> |                      |                          |    |       | <b>2</b>             |                          |  |  |  |
|----------|----------------------|--------------------------|----|-------|----------------------|--------------------------|--|--|--|
| Position | $\delta_C$           | $\delta_H$ (multi, J Hz) |    |       | $\delta_C$           | $\delta_H$ (multi, J Hz) |  |  |  |
| 1        | 171.59 <sup>a</sup>  |                          |    |       | 171.57 <sup>a</sup>  |                          |  |  |  |
| 2        |                      |                          |    |       |                      |                          |  |  |  |
| 3        | 78.13                | 4.88                     | 1H | brs   | 78.13                | 4.88                     |  |  |  |
| 4        | 32.98                | 3.12                     | 2H | brm   | 32.83                | 3.12                     |  |  |  |
| 4a       | 132.67 <sup>b</sup>  |                          |    |       | 132.84 <sup>b</sup>  |                          |  |  |  |
| 5        | 116.24 <sup>c</sup>  | 6.96                     | 1H | s     | 116.28 <sup>c</sup>  | 6.96                     |  |  |  |
| 5a       | 140.07 <sup>d</sup>  |                          |    |       | 140.08 <sup>d</sup>  |                          |  |  |  |
| 6        | 98.10 <sup>e</sup>   | 6.71                     | 1H | s     | 98.12 <sup>e</sup>   | 6.71                     |  |  |  |
| 7        | 161.49 <sup>f</sup>  |                          |    |       | 161.48 <sup>f</sup>  |                          |  |  |  |
| 8        | 108.17 <sup>g</sup>  |                          |    |       | 108.16 <sup>g</sup>  |                          |  |  |  |
| 9        | 155.36 <sup>#</sup>  |                          |    |       | 155.36 <sup>#</sup>  |                          |  |  |  |
| 9-OH     |                      | 9.71                     | 1H | s     |                      | 9.70                     |  |  |  |
| 9a       | 108.45 <sup>h</sup>  |                          |    |       | 108.46 <sup>h</sup>  |                          |  |  |  |
| 10       | 162.82 <sup>##</sup> |                          |    |       | 162.82 <sup>##</sup> |                          |  |  |  |
| 10-OH    |                      | 13.80                    | 1H | s     |                      | 13.81                    |  |  |  |
| 10a      | 99.30 <sup>i</sup>   |                          |    |       | 99.34 <sup>i</sup>   |                          |  |  |  |
| 11       | 55.94 <sup>###</sup> | 3.85                     | 3H | s     | 55.95 <sup>###</sup> | 3.85                     |  |  |  |
| 12       | 42.25                | 1.90                     | 1H | brm   | 42.13                | 1.88                     |  |  |  |
|          |                      | 2.15                     | 1H | brm   |                      | 2.14                     |  |  |  |
| 13       | 69.66                | 4.23                     | 1H | brs   | 69.55                | 4.20                     |  |  |  |
| 14       | 42.78                | 1.66                     | 2H | m     | 42.89                | 1.65                     |  |  |  |
| 15       | 73.35                | 3.94                     | 1H | brs   | 93.36                | 3.92                     |  |  |  |
| 16       | 38.36                | 1.56                     | 2H | m     | 38.38                | 1.49                     |  |  |  |
| 17       | 24.91                | 1.33                     | 1H | m     | 24.93                | 1.32                     |  |  |  |
|          |                      | 1.40                     | 1H | m     |                      | 1.41                     |  |  |  |
| 18       | 31.71                | 1.33                     | 2H | m     | 31.71                | 1.31                     |  |  |  |
| 19       | 22.56                | 1.31                     | 2H | m     | 22.57                | 1.32                     |  |  |  |
| 20       | 13.98                | 0.90                     | 3H | t 6.7 | 14.00                | 0.90 3H t 6.7            |  |  |  |
| 1'       | 171.24 <sup>a</sup>  |                          |    |       | 171.28 <sup>a</sup>  |                          |  |  |  |
| 2'       |                      |                          |    |       |                      |                          |  |  |  |
| 3'       | 76.50                | 4.78                     | 1H | brs   | 76.53                | 4.76                     |  |  |  |
| 4'       | 34.73                | 3.02                     | 2H | brm   | 34.71                | 3.02 2H brm              |  |  |  |
| 4a'      | 132.85 <sup>b</sup>  |                          |    |       | 132.69 <sup>b</sup>  |                          |  |  |  |
| 5'       | 116.05 <sup>c</sup>  | 6.96                     | 1H | s     | 116.09 <sup>c</sup>  | 6.96                     |  |  |  |
| 5a'      | 140.23 <sup>d</sup>  |                          |    |       | 140.04 <sup>d</sup>  |                          |  |  |  |
| 6'       | 98.06 <sup>e</sup>   | 6.71                     | 1H | s     | 98.08 <sup>e</sup>   | 6.71                     |  |  |  |
| 7'       | 161.41 <sup>f</sup>  |                          |    |       | 161.44 <sup>f</sup>  |                          |  |  |  |
| 8'       | 108.08 <sup>g</sup>  |                          |    |       | 108.12 <sup>g</sup>  |                          |  |  |  |
| 9'       | 155.36 <sup>#</sup>  |                          |    |       | 155.36 <sup>#</sup>  |                          |  |  |  |
| 9-OH'    |                      | 9.67                     | 1H | s     |                      | 9.68                     |  |  |  |
| 9a'      | 108.42 <sup>h</sup>  |                          |    |       | 108.43 <sup>h</sup>  |                          |  |  |  |
| 10'      | 162.82 <sup>##</sup> |                          |    |       | 162.82 <sup>##</sup> |                          |  |  |  |
| 10-OH'   |                      | 13.70                    | 1H | s     |                      | 13.71                    |  |  |  |
| 10a'     | 99.26 <sup>i</sup>   |                          |    |       | 99.26 <sup>i</sup>   |                          |  |  |  |
| 11'      | 55.94 <sup>###</sup> | 3.85                     | 3H | s     | 55.95 <sup>###</sup> | 3.85                     |  |  |  |
| 12'      | 20.73                | 1.56                     | 3H | d 6.2 | 20.73                | 1.56 3H d 6.2            |  |  |  |

Chemical shifts are shown with reference to CDCl<sub>3</sub> as 77.0 ppm for <sup>13</sup>C and 7.26 ppm for <sup>1</sup>H.  
a, b, c, d, e, f, g, h, i: Chemical shifts are exchangeable. #, ##, ###: Overlapped

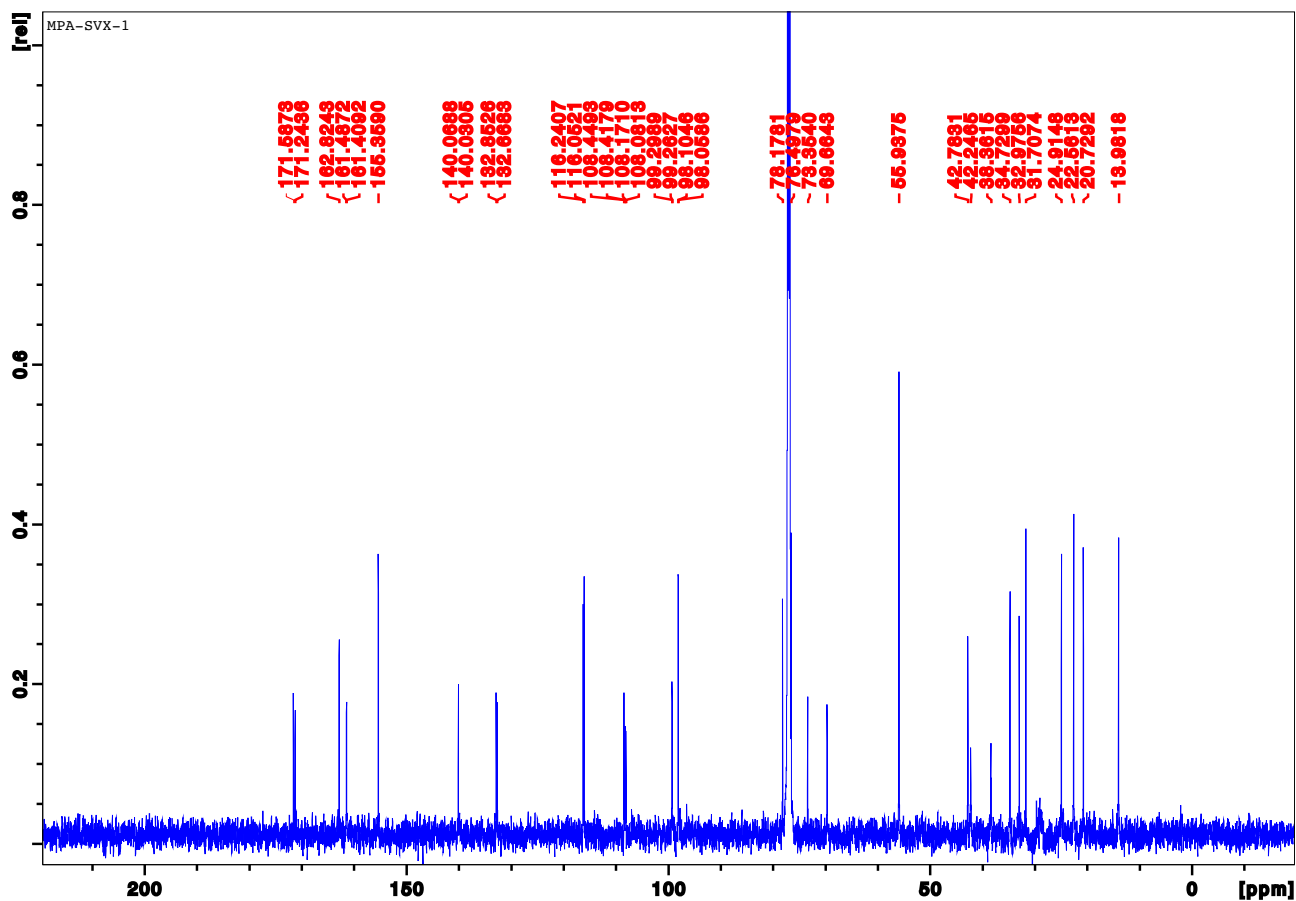

Supplementary Figure S3.  $^{13}\text{C}$  NMR spectrum of compound **1** (150 MHz,  $\text{CDCl}_3$ )

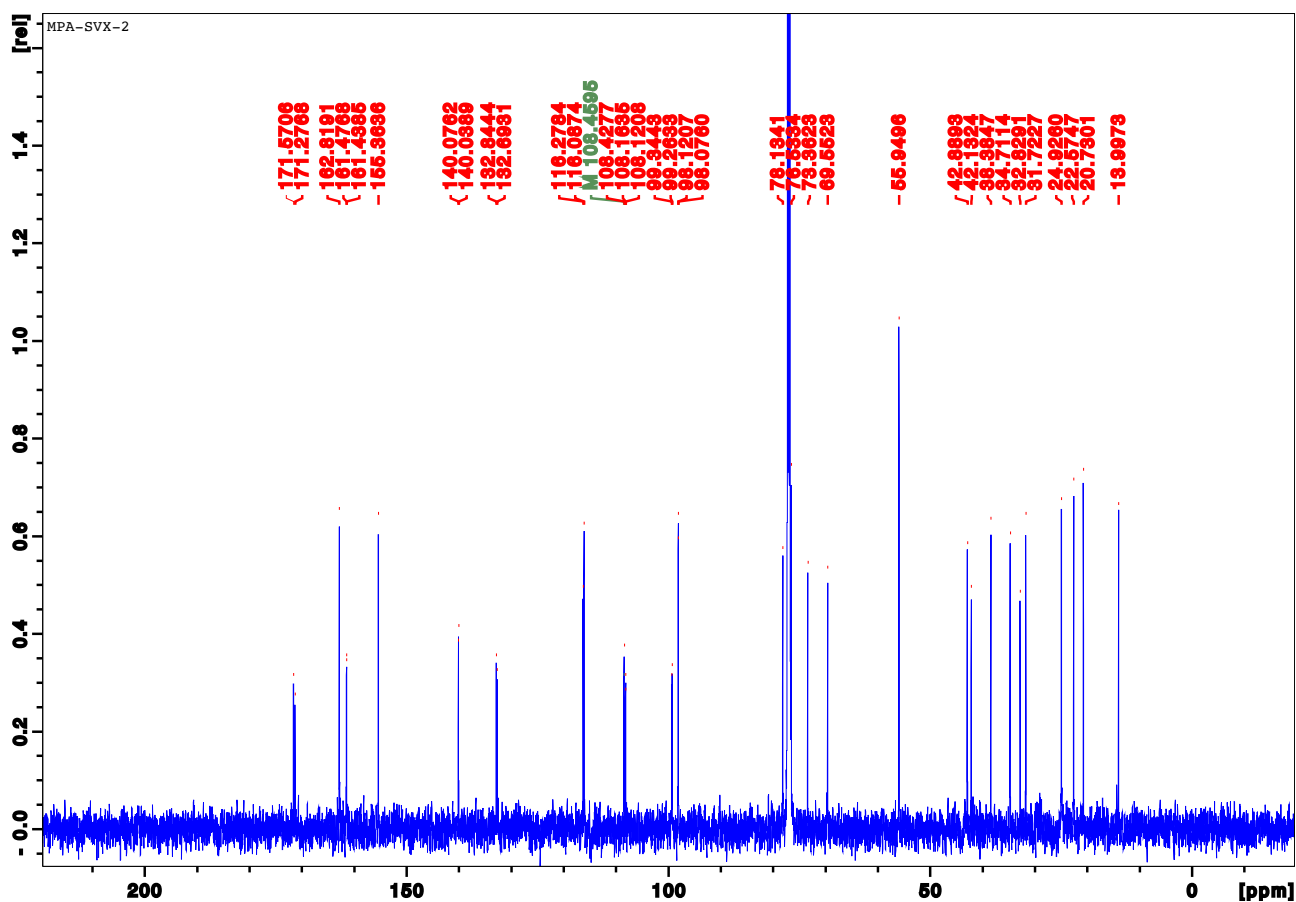

Supplementary Figure S4.  $^{13}\text{C}$  NMR spectrum of compound **2** (150 MHz,  $\text{CDCl}_3$ )

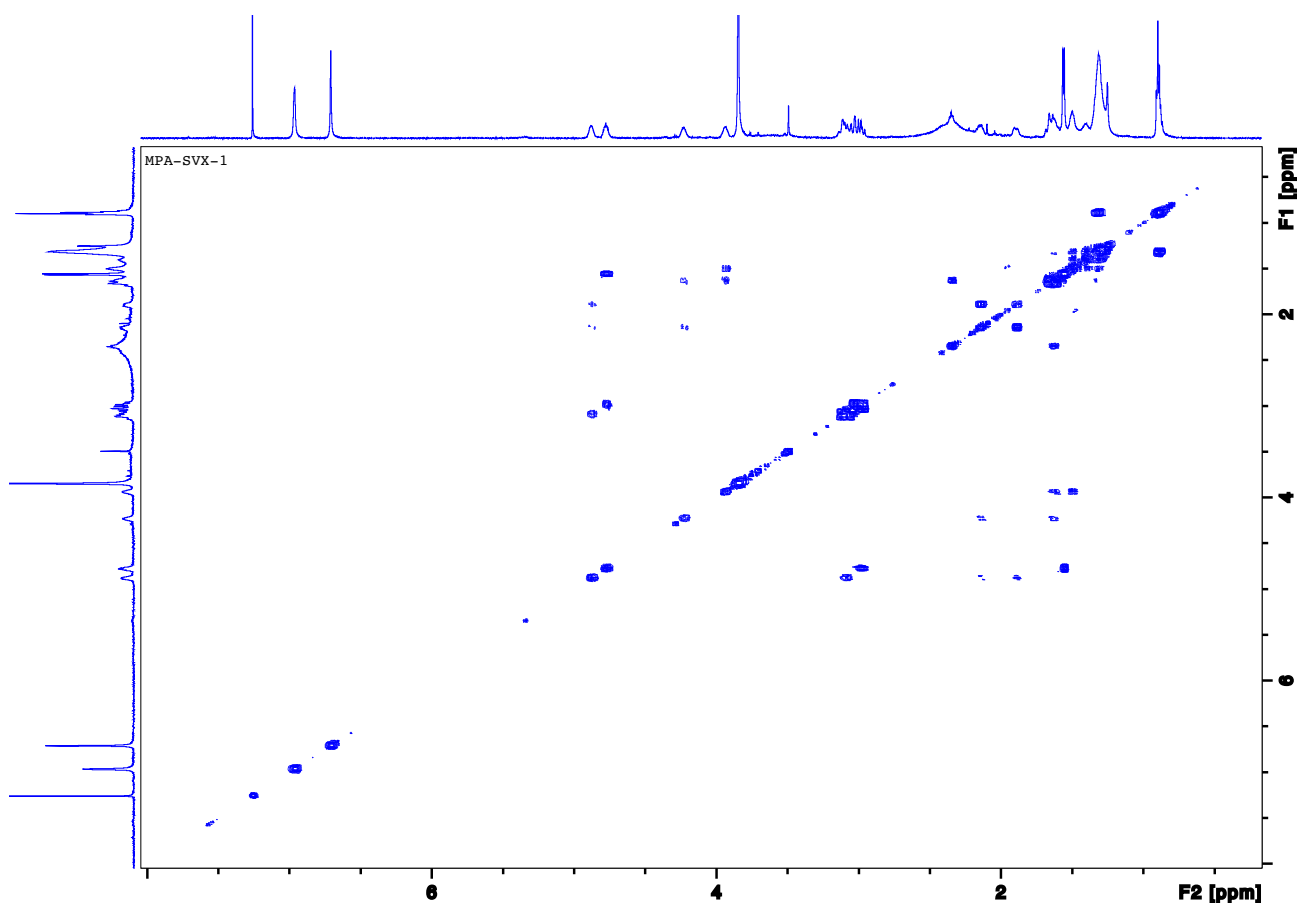

Supplementary Figure S5.  $^1\text{H}$ - $^1\text{H}$  COSY spectrum of compound **1** (600 MHz,  $\text{CDCl}_3$ )

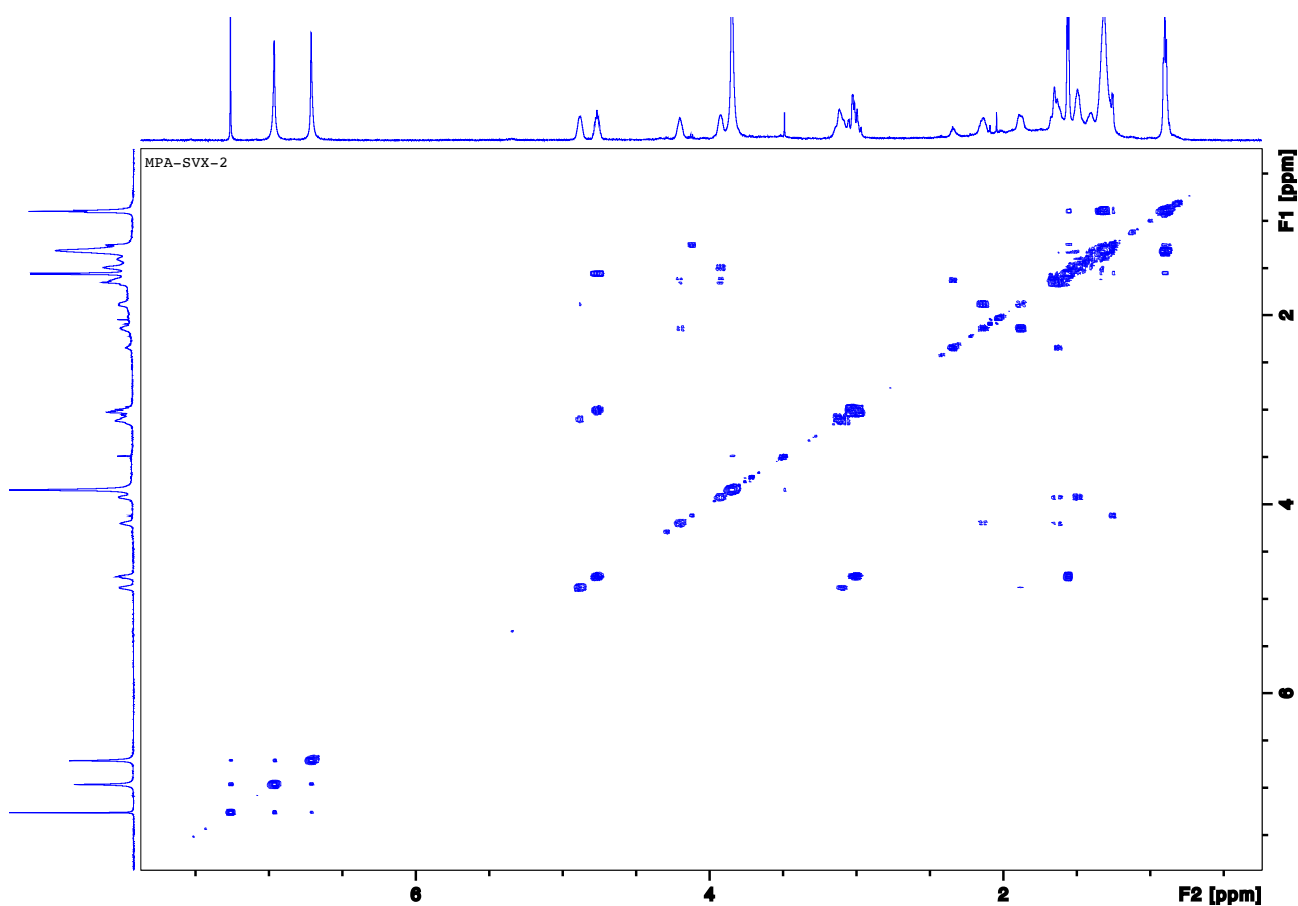

Supplementary Figure S6.  $^1\text{H}$ - $^1\text{H}$  COSY spectrum of compound **2** (600 MHz,  $\text{CDCl}_3$ )

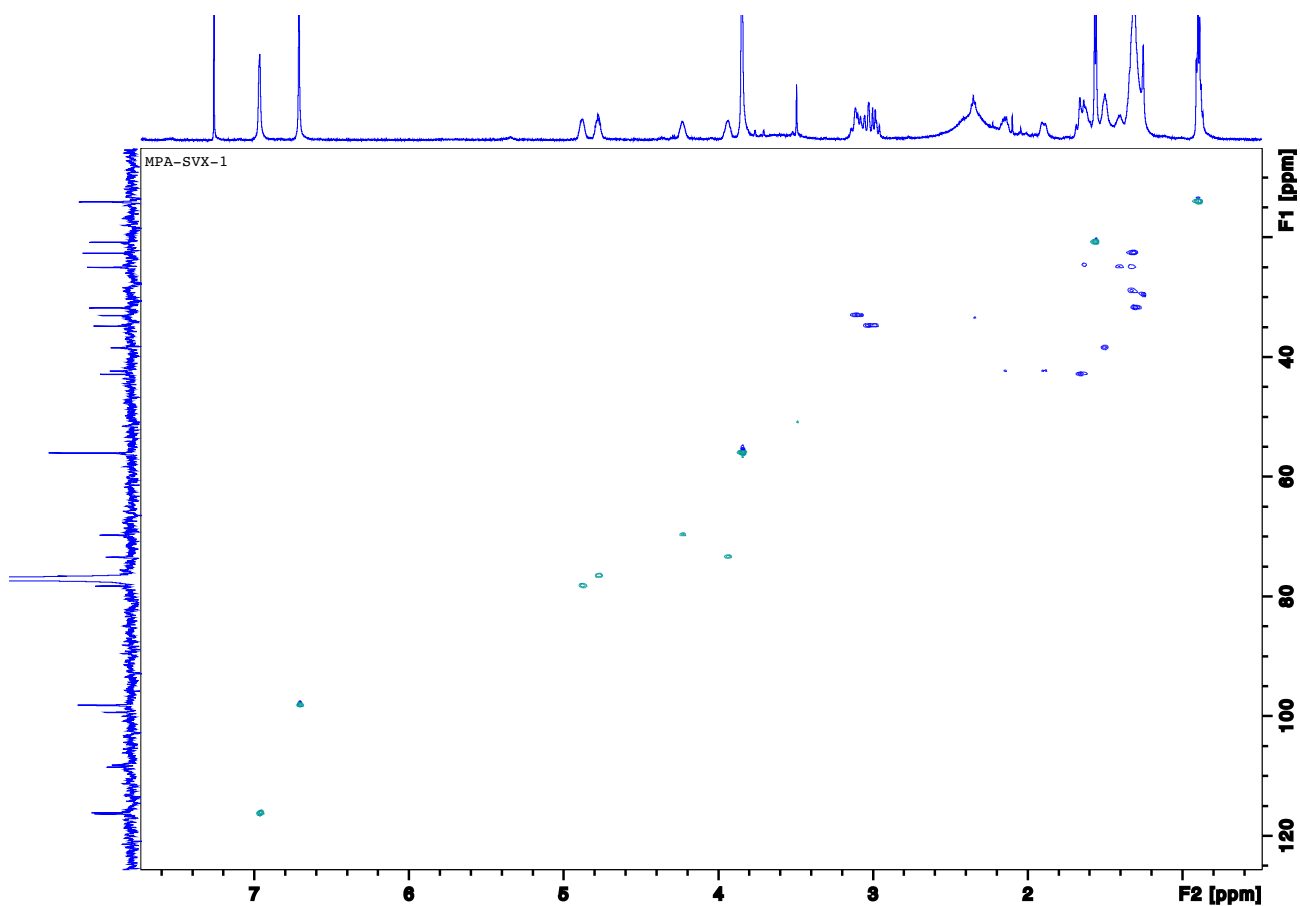

Supplementary Figure S7. HSQC spectrum of compound **1** (600 MHz, 150 MHz, CDCl<sub>3</sub>)

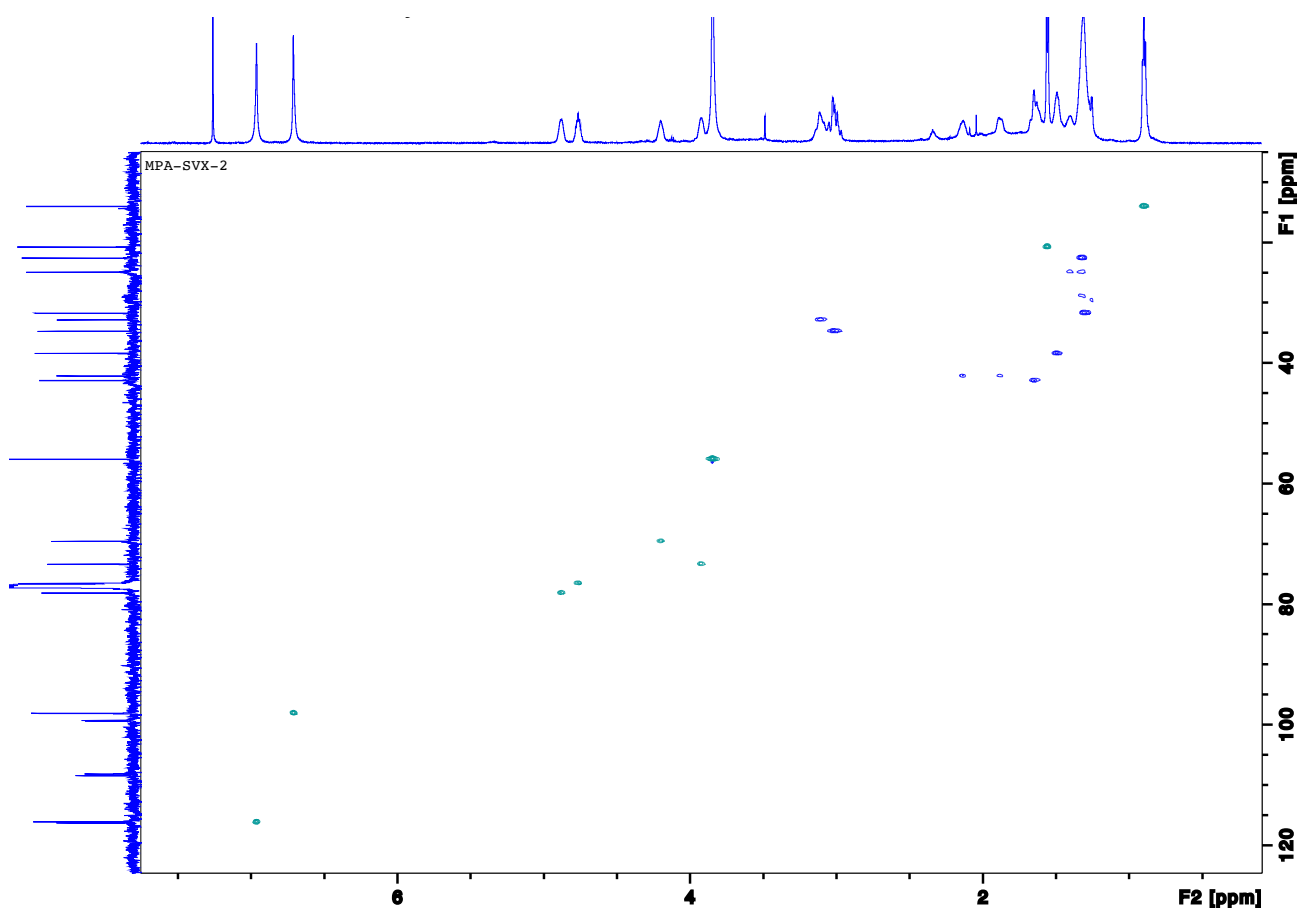

Supplementary Figure S8. HSQC spectrum of compound **2** (600 MHz, 150 MHz, CDCl<sub>3</sub>)

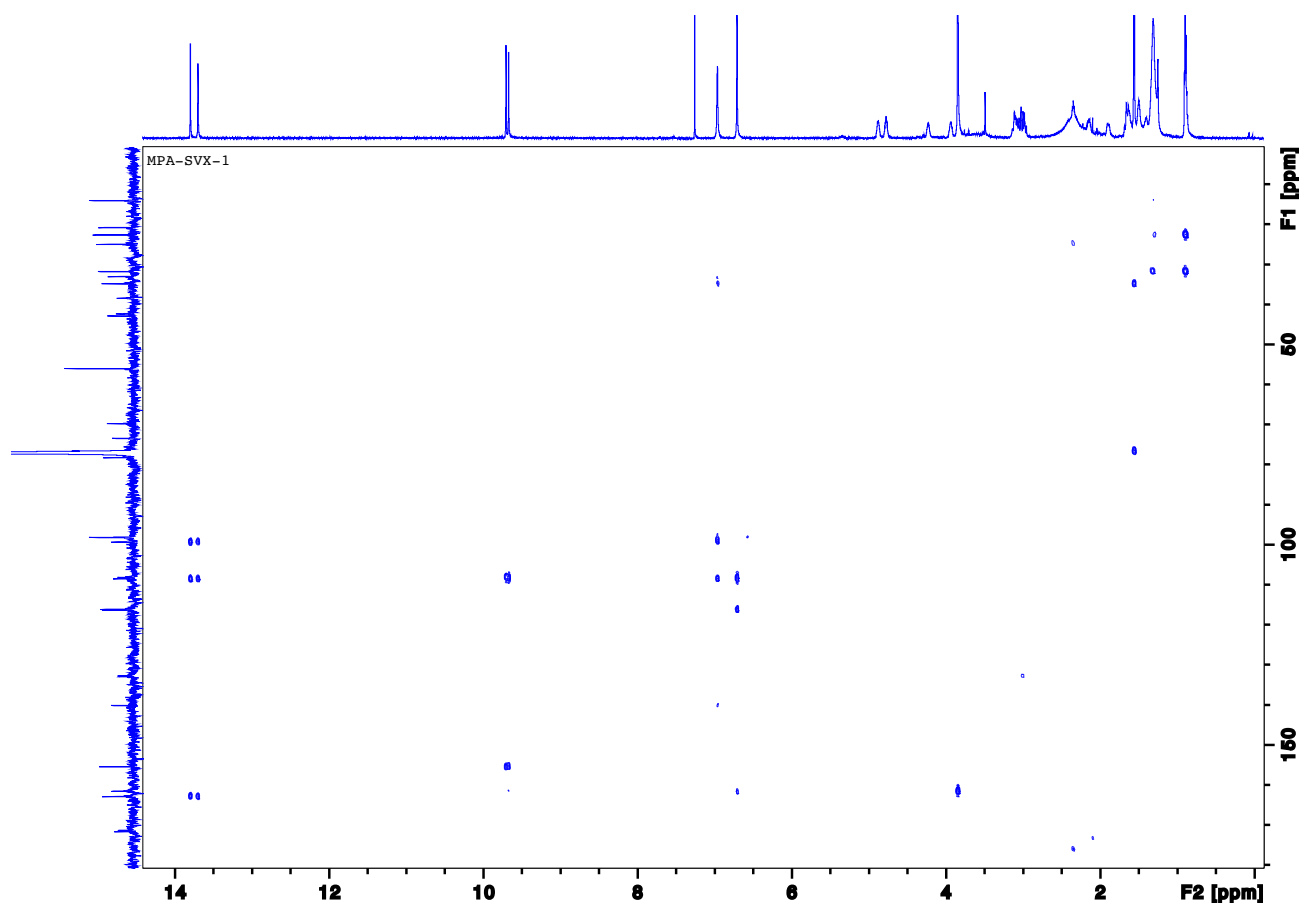

Supplementary Figure S9. HMBC spectrum of compound **1** (600 MHz, 150 MHz, CDCl<sub>3</sub>)

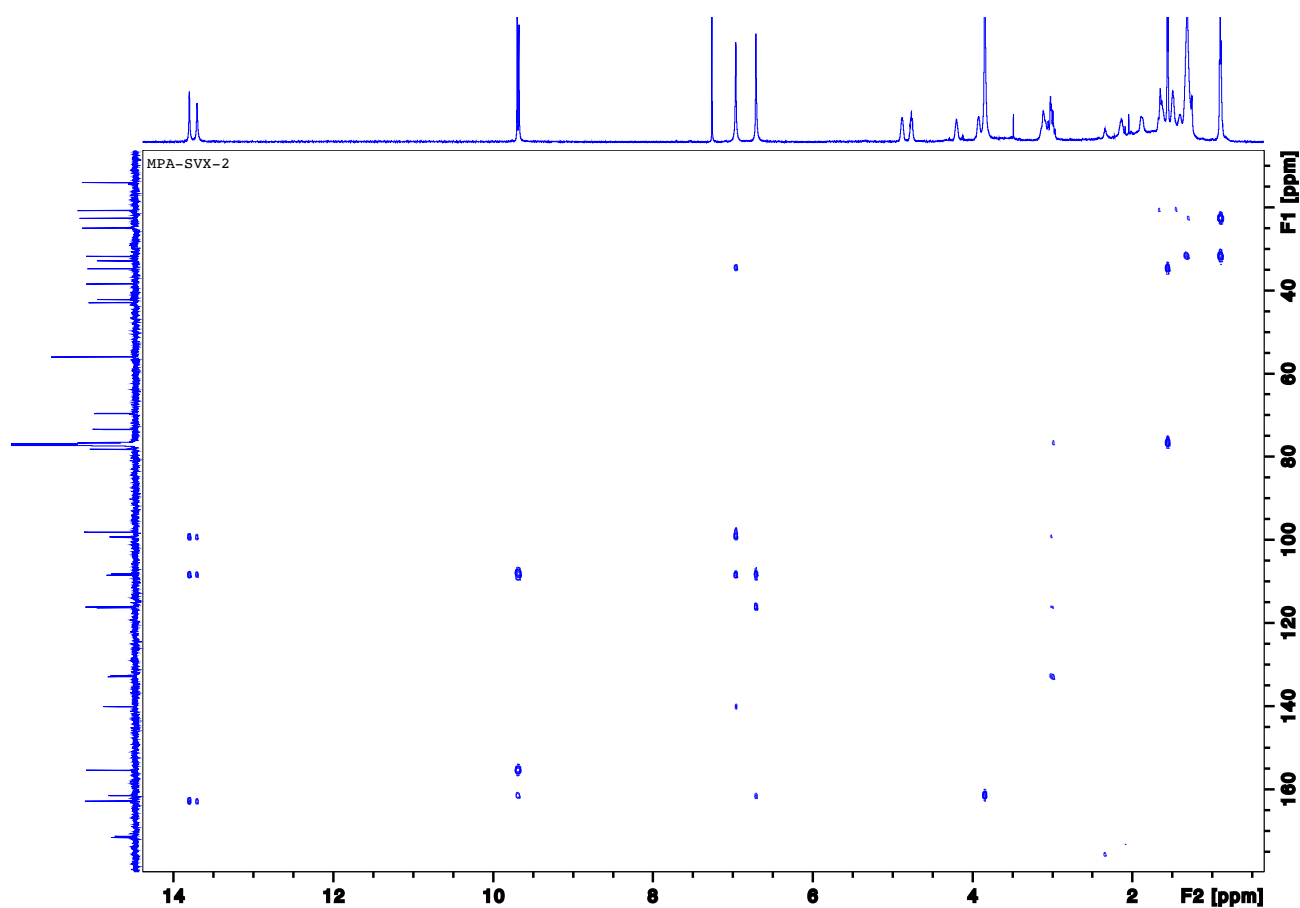

Supplementary Figure S10. HMBC spectrum of compound **2** (600 MHz, 150 MHz, CDCl<sub>3</sub>)



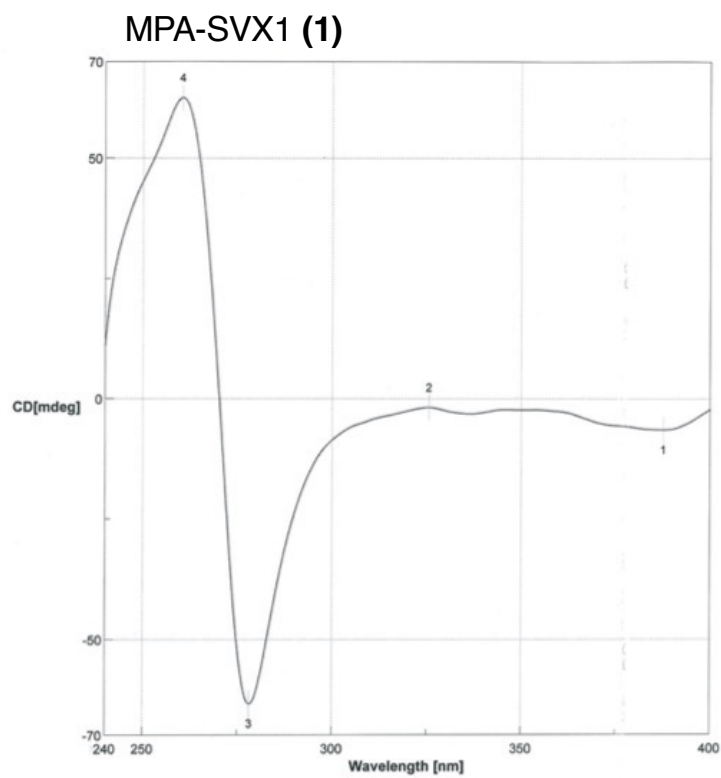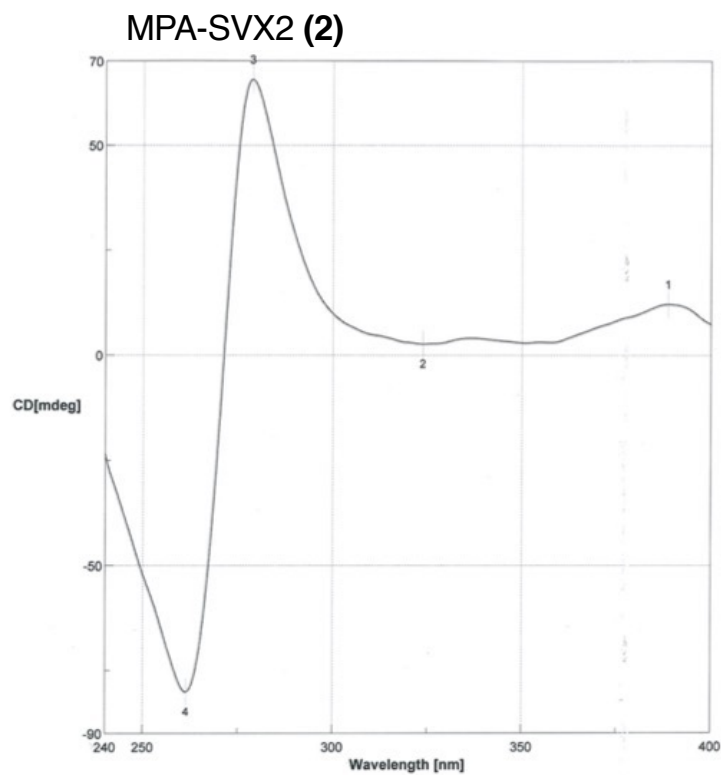

Supplementary Figure S11. CD spectrum of compounds **1** and **2**.
